# Supplementary material
Source: ML conference proceedings conference paper supplement (https://aclanthology.org/2020.nlposs-1.17)
Supplement: OptionalSupplementaryMaterial [file 2020.nlposs-1.17.OptionalSupplementaryMaterial.pdf]

## **A Example Dataset Files**

Example JSON objects that are serialized in the task, scored summary, and metric scores files (see §4) are included in Listings 1, 2, and 3.

```

{
  "instance_id": "d0801-A",
  "documents": [
    {
      "filename": "AFP_ENG_20050115.0485",
      "text": "The A380, the new Airbus..."
    },
    ...
  ],
  "summaries": [
    {
      "annotator": "G",
      "text": "In 1994 Airbus began engineering..."
    },
    ...
  ]
}

```

Listing 1: An example JSON object included in the files that contain the summarization task data. The `documents` and `summaries` objects are the list of input documents and reference summaries for the instance identified by `instance_id`.

```

{
  "instance_id": "d0801-A",
  "summarizer_id": "0",
  "summarizer_type": "peer",
  "summary": {
    "text": "The superjumbo Airbus A380..."
  }
  "references": [
    {
      "summarizer_id": "G",
      "text": "In 1994 Airbus began engineering..."
    },
    ...
  ]
}

```

Listing 2: An example JSON object included in the files that contain the summaries which were scored by human judges. The `summary` object is the summary output by the system identified by `summarizer_id` on input instance `instance_id`. The `summarizer_type` field marks the summary was produced by a model (also called a “peer”) and not a human. The `references` object contains the reference summaries for this input instance.

```
{
  "instance_id": "d0801-A",
  "summarizer_id": "0",
  "summarizer_type": "peer",
  "metrics": {
    "overall_responsiveness": 3,
    "modified_pyramid_score": 0.241,
    "rouge-1": {
      "recall": 26.7,
      "precision": 29.4,
      "f1": 28.0
    },
    ...
  }
}
```

Listing 3: An example JSON object included in the files that contain the metric values for the scored summaries. The `instance_id` and `summarizer_id` identify that these metrics are for the the summary data included in the parallel file (i.e., Listing 2). That summary's metric values are contained in the `metrics` dictionary.
